# Supplementary material
Source: PubMed Central journal article supplement (PMC7790171)
Supplement: NIHMS1653713-supplement-Supplement.pdf [file NIHMS1653713-supplement-Supplement.pdf]

**Supplementary Figure 1. Parameters used for ICB treatment group stratification.**

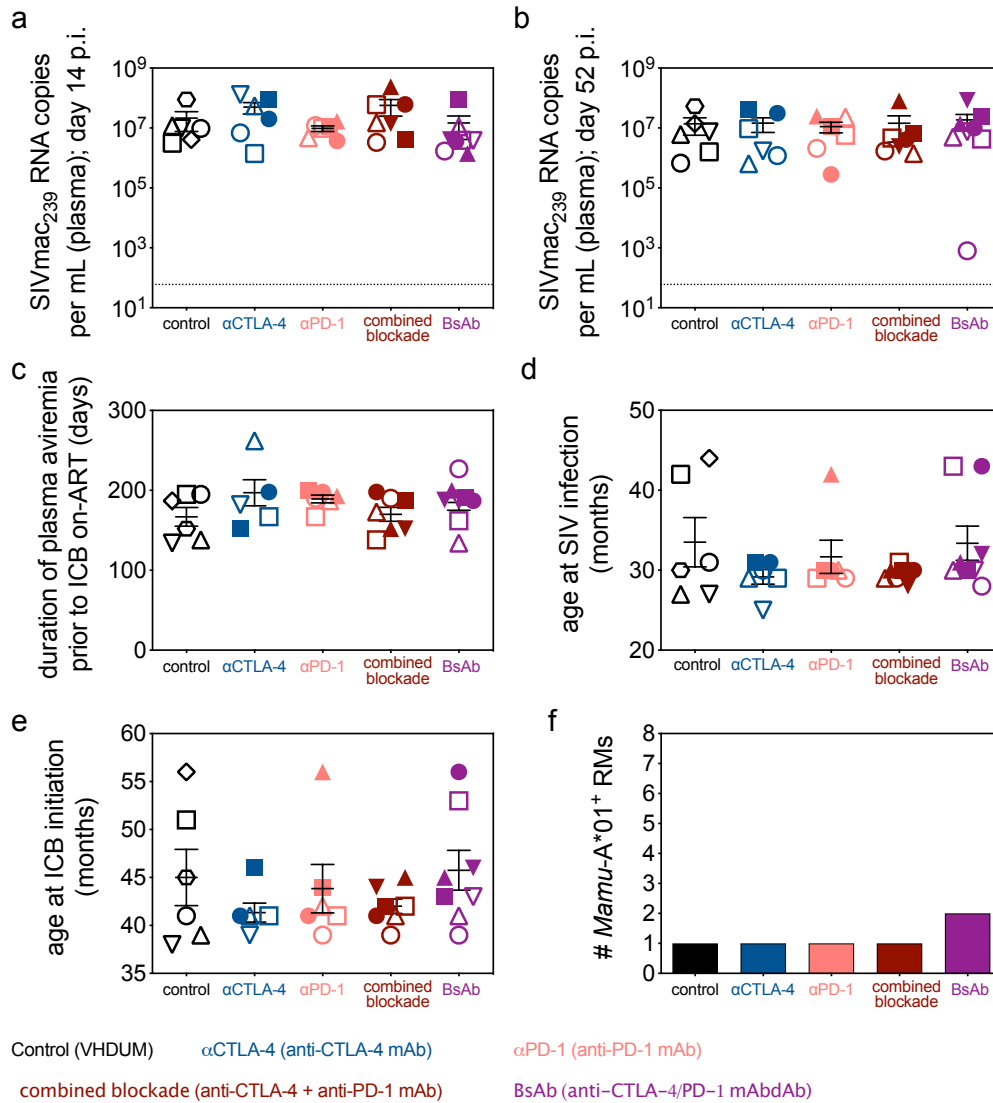

The plasma viral load (SIV<sub>mac239</sub> RNA copies per mL) was quantified by RT-qPCR during (a) acute infection (d14 p.i.) and (b) chronic infection prior to ART initiation (d52 p.i.). The hashed horizontal line indicates the assay's limit of detection ( $\leq 60$  copies/mL). (c) The duration of on-ART virological suppression prior to ICB treatment was calculated from the first undetectable observation following ART initiation. The age of each RM was calculated relative to (d) SIV infection (d0 p.i.) and (e) to the initiation of ICB treatment (d0 p.t.). (f) All RMs were haplotyped for MHC repertoire (all were *Mamu-B\*08*<sup>-</sup> and *-B\*17*<sup>-</sup>) and the number of *Mamu-A\*01*<sup>+</sup> RMs is given per treatment group. Averaged data are presented as the mean  $\pm$  SEM, and analyzed with a two-sided, two-way ANOVA with Dunn's correction for all treatment combinations. Individual RMs are indicated by shape with closed data points indicating animals with viral reactivation in plasma during ICB. All RMs are color-coded and grouped based on ICB therapy as follows with population sizes as indicated for all analyses: controls (n=6), black; αCTLA-4 (n=6), blue; αPD-1 (n=6), pink; combined blockade (n=7), red; and BsAb (n=8), purple.

**Supplementary Figure 2. Representative gating strategy for longitudinal immunophenotyping.**

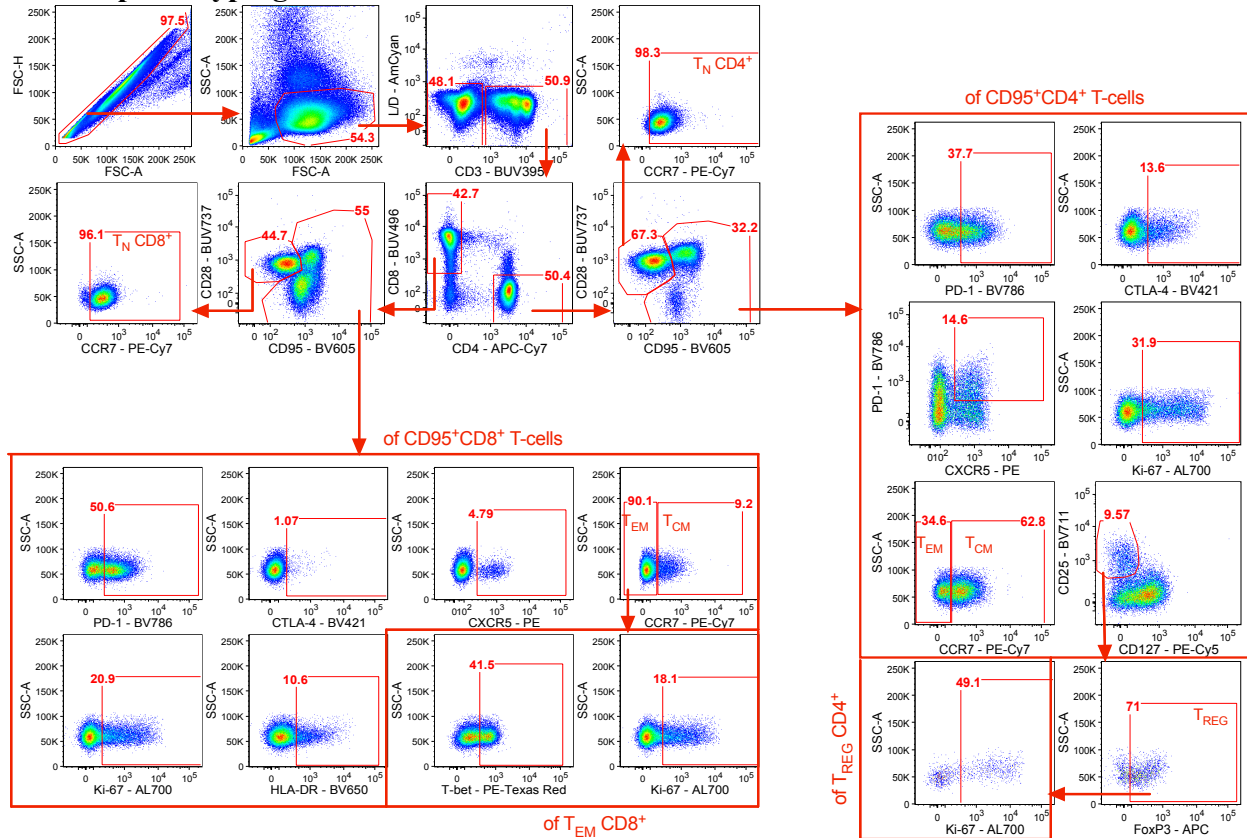

A representative gating strategy is given for the longitudinal immunophenotyping of blood and tissues. Red arrows indicated the successive hierarchy of gates and clusters of biomarkers within a common parental population are outlined with a red border and annotated appropriately. T-cell subsets of interest are annotated as follows:  $T_N$ , naïve;  $T_{EM}$ , effector-memory;  $T_{CM}$ , central-memory; and  $T_{REG}$ , regulatory T-cell. Shown are PBMCs at day -29 p.t. from RHj16.

**Supplementary Figure 3. Combined blockade does not induce anemia, thrombocytopenia, nephrotoxicity, or hepatotoxicity.**

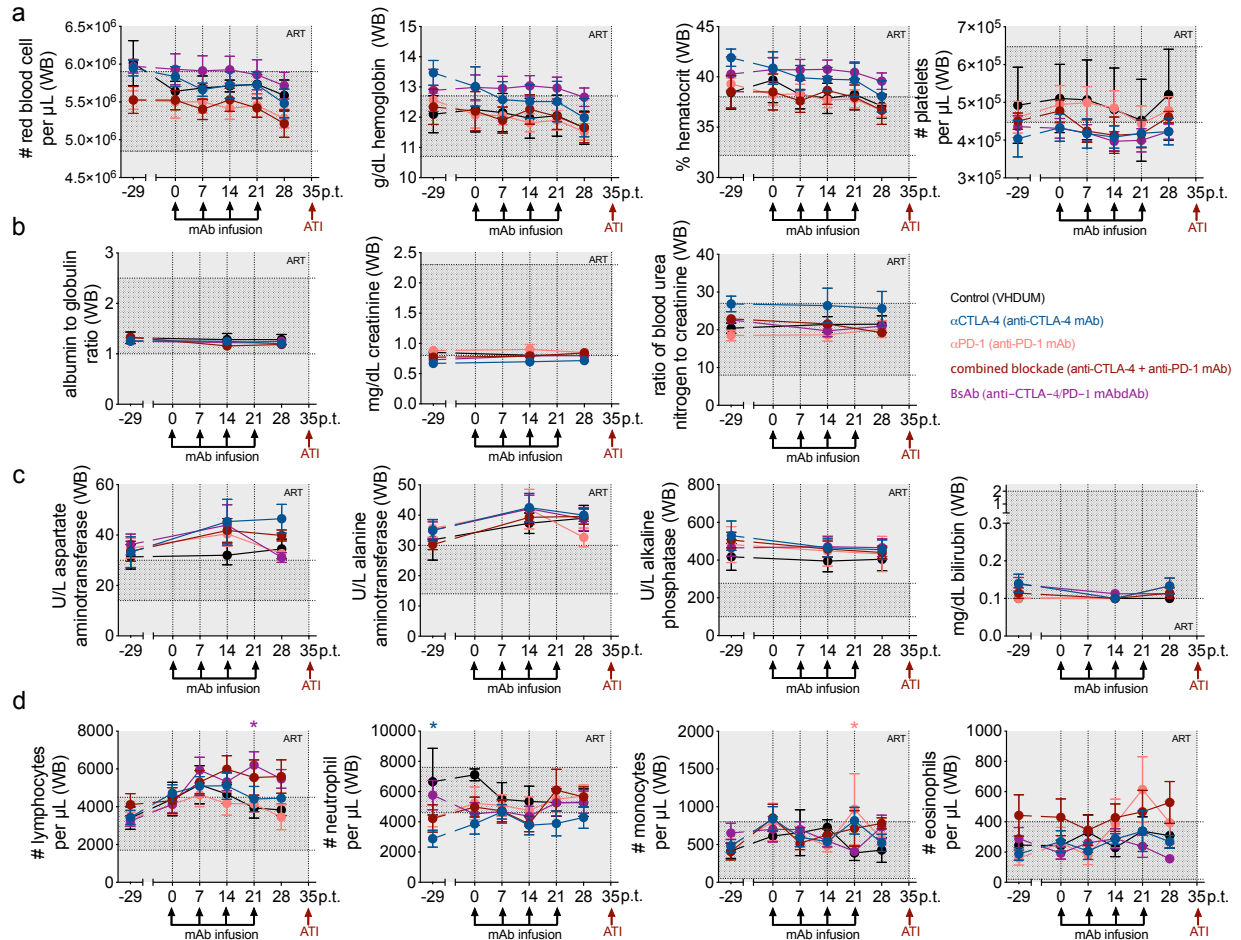

(a) In WB, CBCs were employed to monitor for hematological indicators of anemia such as the red blood cell count (per  $\mu\text{L}$ ), hemoglobin (g/dL), and hematocrit (%); whereas, the platelet count (per  $\mu\text{L}$ ) was used to screen for thrombocytopenia. (b) Serum chemistries readouts for nephrotoxicity include the albumin to globulin ratio, creatinine (mg/dL), and the blood urea nitrogen (BUN) to creatinine ratio; furthermore, (c) aspartate aminotransferase (U/L), alanine aminotransferase (U/L), alkaline phosphatase (U/L), and bilirubin (mg/dL) were employed to assess hepatotoxicity. (d) Counts of leukocyte subsets (lymphocytes, neutrophils, monocytes, and eosinophils) per  $\mu\text{L}$  of whole blood (WB) are shown as quantified from a complete blood count (CBC). Horizontal, dashed lines with hashed shading indicate the normal range of values for indoors, juvenile RMs. All RMs are color-coded and grouped based on ICB therapy as follows with population sizes as indicated for all analyses: controls (n=6), black;  $\alpha\text{CTLA-4}$  (n=6), blue;  $\alpha\text{PD-1}$  (n=6), pink; combined blockade (n=7), red; and BsAb (n=8), purple. Averaged data are presented as the mean  $\pm$  SEM, and were analyzed with a mixed-effects models with the Dunnett correction for multiple comparisons relative to controls. Color-coded statistical asterisks indicate significance between control animals and the treatment group of that color. \*, p<0.05; \*\*, p<0.01; \*\*\*, p<0.001; \*\*\*\*, p<0.0001.

**Supplementary Figure 4. Lymphoid T<sub>FH</sub> are not depleted by PD-1 blockade and CTLA-4<sup>+</sup>CD4<sup>+</sup> T-cells are expanded by CTLA-4 blockade.**

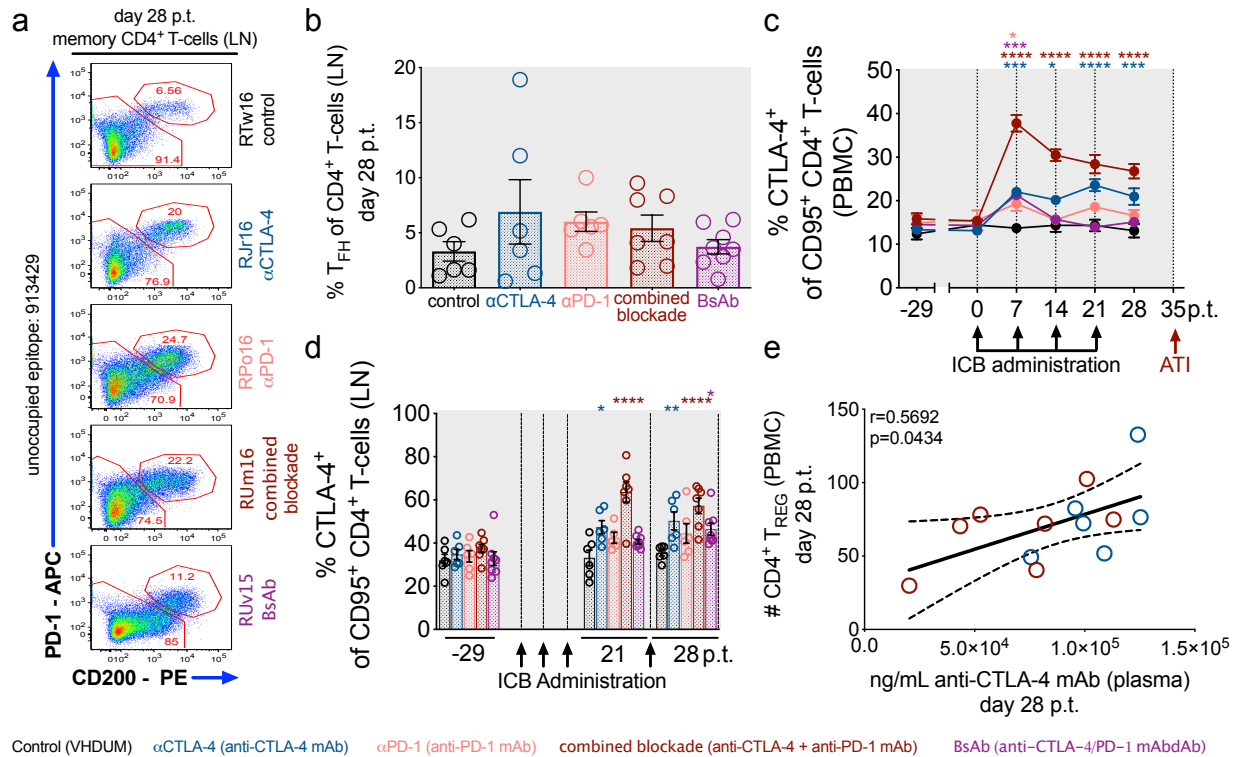

(a) A representative stain is given for the co-expression of CD200 and unmasked PD-1 (clone 913429) per T<sub>FH</sub> discrimination within LN memory CD4<sup>+</sup> T-cells following the fourth ICB infusion (d28 p.t.) segmented by ICB treatment (indicated at right; 5 of 33 unique runs of single replicate; numbers indicate the frequency of parent), and (b) the frequency of T<sub>FH</sub> was quantified in CD4<sup>+</sup> T-cells. By flow cytometry, the frequency of memory CD4<sup>+</sup> T-cells expressing CTLA-4 were measured longitudinally in (c) PBMCs and (d) LN. All RMs are color-coded and grouped based on ICB therapy as follows with population sizes as indicated for all phenotypic analyses: controls (n=6), black;  $\alpha$ CTLA-4 (n=6), blue;  $\alpha$ PD-1 (n=6), pink; combined blockade (n=7), red; and BsAb (n=8), purple. (e) The number of CD4<sup>+</sup> T<sub>REG</sub>s per  $\mu$ L of PB was correlated against the contemporaneous concentration (ng/mL) of anti-CTLA-4 mAb in plasma at d28 p.t. (n=13). Averaged data are presented as the mean  $\pm$  SEM, and were analyzed with a two-sided (b) Kruskal-Wallis test with Dunn's correction relative for multiple comparisons relative to controls, (c,d) a mixed-effects model with Dunnett's correction relative to controls, or (e) a Pearson correlation coefficient. Color-coded statistical asterisks indicate significance between control animals and the treatment group of that color. \*, p<0.05; \*\*, p<0.01; \*\*\*, p<0.001; \*\*\*\*, p<0.0001.

**Supplementary Figure 5. Combined blockade reduces the frequency of non-dividing CD4<sup>+</sup> T-cells.**

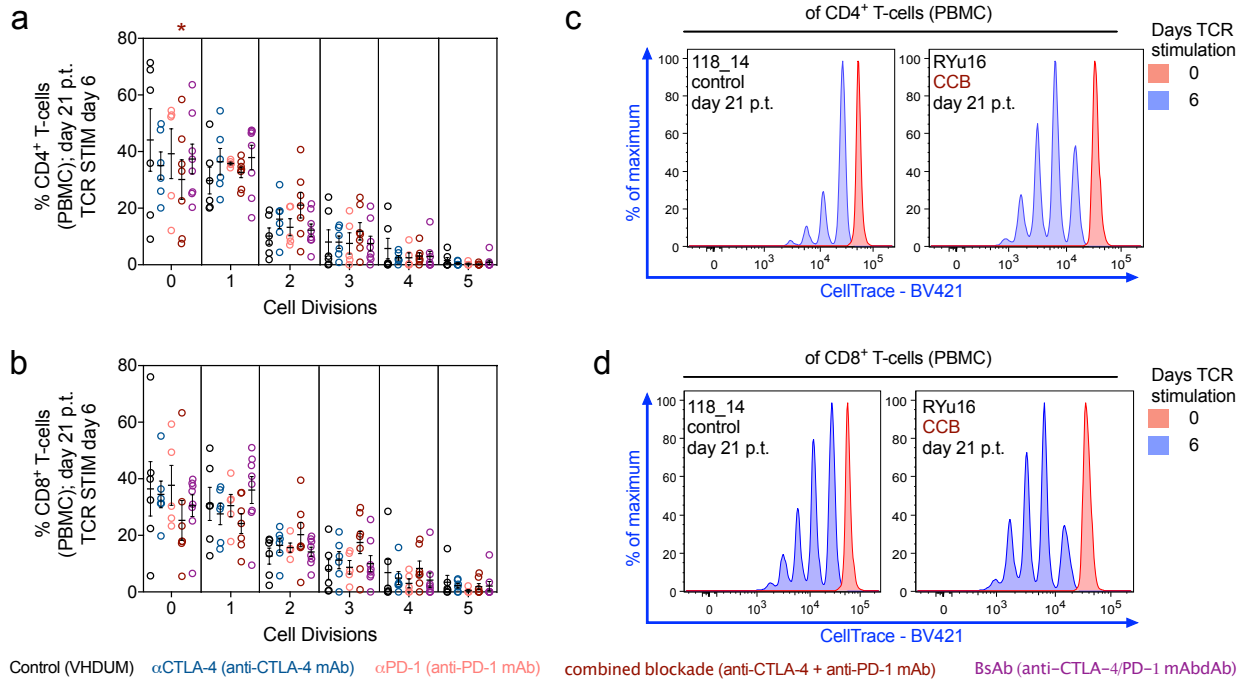

The frequency of cell divisions in **(a)** CD4<sup>+</sup> and **(b)** CD8<sup>+</sup> T-cells in PBMCs at day 21 p.t. was determined by CellTrace Violet labeling following 6 days of stimulation with IL-2, anti-CD3, anti-CD2, and anti-CD28 mAbs. All RMs are color-coded and grouped based on ICB therapy as follows with population sizes as indicated: controls (n=6), black; αCTLA-4 (n=6), blue; αPD-1 (n=5), pink; combined blockade (n=7), red; and BsAb (n=8), purple. Representative overlays are shown for CellTrace Violet labeling normalized as a percentage of maximum for **(c)** CD4<sup>+</sup> and **(d)** CD8<sup>+</sup> T-cells with the day of stimulation annotated by color (at right; 2 of 32 unique runs of single replicate). Undivided cells (0 cell divisions) are at right and are down-shifted relative to initial labeling. Each CellTrace peak extending left is quantified as a successive cell division. Averaged data are presented as the mean ± SEM, and were analyzed with a two-sided, two-way ANOVA with Dunnett's correction for multiple comparisons relative to controls. Color-coded asterisks indicate significance between controls and the ICB treatment group of that color. \*, p<0.05; \*\*, p<0.01; \*\*\*, p<0.001; \*\*\*\*, p<0.0001.

## Supplementary Figure 6. SIV-specific cytokine responses in T-cells are not enhanced by ICB.

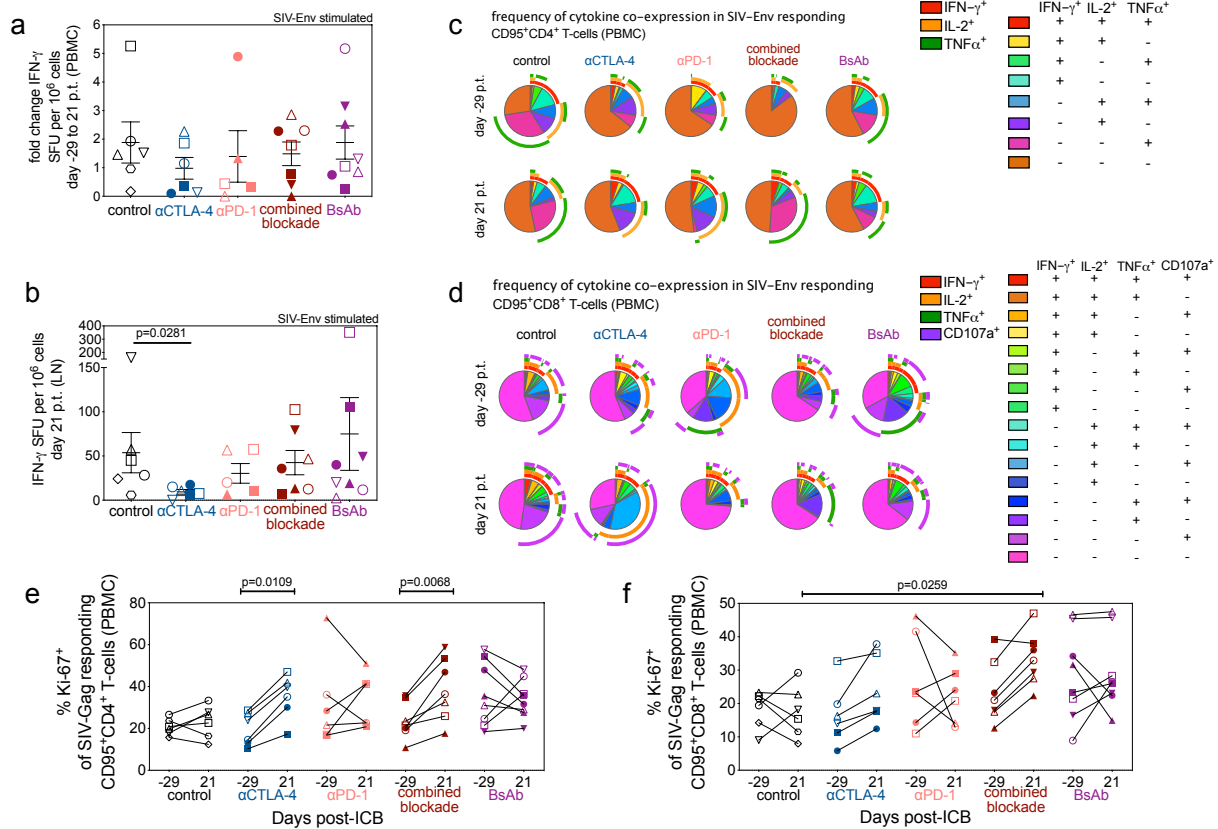

The number of interferon gamma (IFN- $\gamma$ ) spot forming units (SFU) per  $10^6$  mononuclear cells were quantified by ELISpot, performed in triplicate, upon SIV-Env stimulation in (a) PBMCs as a fold-change (d21 p.t. relative to d-29 p.t.) and (b) cross-sectionally in LN (d21 p.t.). Population sizes for all ELISpot analyses are as follows: controls (n=6), black;  $\alpha$ CTLA-4 (n=6), blue;  $\alpha$ PD-1 (n=6), pink; combined blockade (n=7), red; and BsAb (n=8), purple. From *ex vivo* SIV-Env-stimulated PBMCs with unstimulated background subtracted, the distribution of cytokine co-expression was determined via flow cytometry in memory (c) CD4 $^+$  and (d) CD8 $^+$  T-cells before (d-29 p.t.) and during (d21 p.t.; indicated at left) ICB administration (indicated above). Rainbow-colored inner pie wedges represent each Boolean combination of cytokine co-expression (annotated at far right); whereas, the stacked, outer concentric rings overlap with pie wedges that are positive for that cytokine (indicated at middle right): IFN- $\gamma$  $^+$ , red; IL-2 $^+$ , orange; TNF $\alpha$  $^+$ , green; and CD107a $^+$ , purple. The frequency of cycling cells (Ki-67 $^+$ ) was quantified in responding (i.e. IFN- $\gamma$  $^+$  and/or IL-2 $^+$ , and/or TNF $\alpha$  $^+$ , and/or CD107a $^+$ ) PBMC memory (e) CD4 $^+$  and (f) CD8 $^+$  T-cells following SIV-Gag peptide stimulation. Population sizes for all phenotypic analyses are as follows: controls (n=6), black;  $\alpha$ CTLA-4 (n=6), blue;  $\alpha$ PD-1 (n=6), pink; combined blockade (n=7), red; and BsAb (n=8), purple. Each data point represents an individual animal, as indicated by shape, and those with ICB-related viral reactivation in plasma are represented as closed data points. Averaged data are presented as the mean  $\pm$  SEM, and were analyzed with two-sided (a,b) a Mann-Whitney U test; (c,d) a Permutation test; or (e,f) a two-way ANOVA with Bonferroni's correction for multiple comparisons relative to baseline and controls. \*, p<0.05; \*\*, p<0.01; \*\*\*, p<0.001; \*\*\*\*, p<0.0001.



**Supplementary Figure 7. Prior ICB treatment does not impact cell-associated SIV-DNA and SIV-RNA content in tissue following ART interruption.**

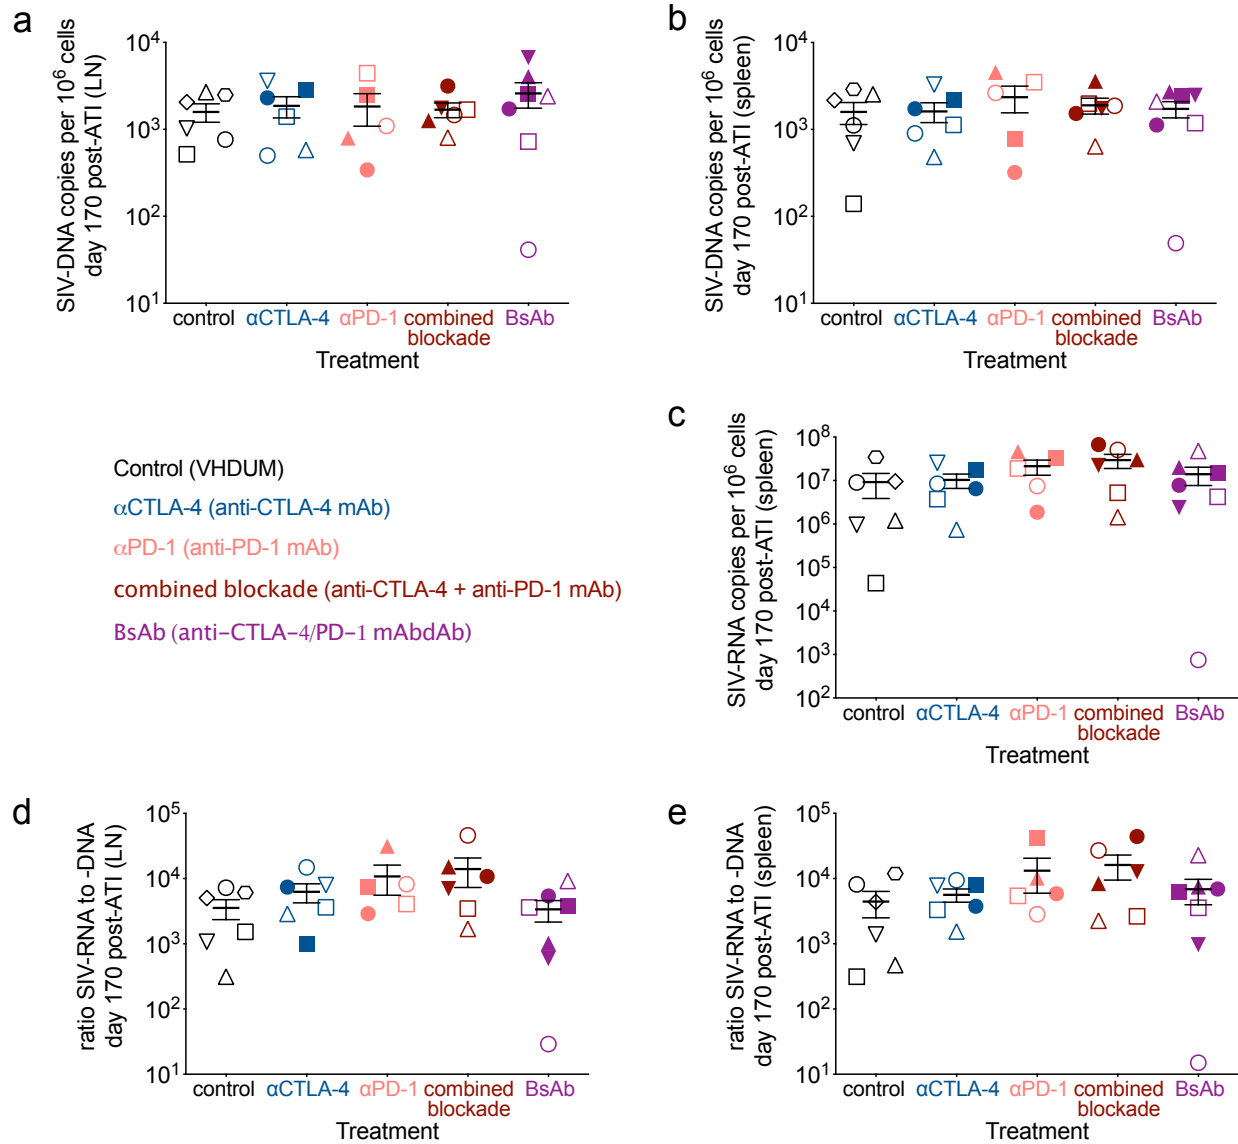

By 12 replicate reaction RT-qPCR, the number of SIV-DNA copies per  $10^6$  cells was measured at necropsy (day 170 post-ATI) in bulk (a) axillary LN and (b) in spleen. (c) Likewise, the number of SIV-RNA copies per  $10^6$  cells was quantified in bulk spleen. From these data sets, the ratio of SIV-RNA to -DNA content was computed for both (d) axillary LN and (e) spleen. Each data point represents an individual animal, as indicated by shape, and those with prior ICB-related viral reactivation in plasma are represented as closed data points. All RMs are color-coded and grouped based on ICB therapy as follows with population sizes as indicated: controls (n=6), black;  $\alpha$ CTLA-4 (n=6), blue;  $\alpha$ PD-1 (n=5), pink; combined blockade (n=6), red; and BsAb (n=7), purple. Averaged data are presented as the mean  $\pm$  SEM and were analyzed with a two-sided Mann-Whitney U test. \*,  $p < 0.05$ ; \*\*,  $p < 0.01$ ; \*\*\*,  $p < 0.001$ ; \*\*\*\*,  $p < 0.0001$ .

**Supplementary Table 1. Screening of anti-drug antibodies in RMs prior to and during chronic infection for treatment stratification.**

| Animal ID     | ICB Treatment | Annotated Symbol | ECL of anti-drug antibodies (plasma) <sup>a</sup> |            |            |                                 |            |            |            |
|---------------|---------------|------------------|---------------------------------------------------|------------|------------|---------------------------------|------------|------------|------------|
|               |               |                  | pre-infection (day -21 p.i.)                      |            |            | chronic infection (day 52 p.i.) |            |            |            |
|               |               |                  | αPD-1                                             | αCTLA-4    | control    | αPD-1                           | αCTLA-4    | control    | BsAb       |
| RGi16         | control       | ○                | 61                                                | 163        | 228        | <b>176</b>                      | <b>253</b> | 246        | <b>268</b> |
| RJd16         | control       | □                | 54                                                | 103        | 120        | 71                              | <b>216</b> | 185        | 192        |
| RTw16         | control       | △                | 72                                                | 94         | 89         | 57                              | 100        | 191        | 128        |
| 118_14        | control       | ▽                | 69                                                | 94         | 138        | 74                              | 141        | 172        | 168        |
| RFu15         | control       | ◇                | 74                                                | 67         | 92         | <b>107</b>                      | 67         | 170        | 92         |
| RHj16         | control       | ◊                | 63                                                | 65         | 83         | 61                              | 57         | 70         | 66         |
| RHn16         | αCTLA-4       | ○                | <b>115</b>                                        | <b>300</b> | <b>360</b> | 56                              | <b>299</b> | <b>374</b> | <b>385</b> |
| RTj16         | αCTLA-4       | ●                | 59                                                | <b>376</b> | <b>410</b> | 55                              | <b>363</b> | <b>327</b> | <b>379</b> |
| RJr16         | αCTLA-4       | □                | <b>95</b>                                         | <b>226</b> | 149        | 53                              | 157        | 179        | 185        |
| RAq16         | αCTLA-4       | △                | 80                                                | <b>283</b> | 244        | <b>112</b>                      | <b>208</b> | 217        | <b>334</b> |
| 138_14        | αCTLA-4       | ▽                | 67                                                | 154        | 160        | <b>128</b>                      | <b>244</b> | <b>405</b> | <b>375</b> |
| RAi16         | αCTLA-4       | ■                | <b>96</b>                                         | <b>236</b> | <b>520</b> | <b>105</b>                      | 204        | <b>340</b> | <b>227</b> |
| RWs16         | αPD-1         | ○                | 61                                                | 82         | 132        | 54                              | 100        | 241        | 187        |
| RPo16         | αPD-1         | ●                | 63                                                | <b>517</b> | 110        | 60                              | 108        | 82         | 104        |
| RPn16         | αPD-1         | □                | 68                                                | 98         | 118        | 61                              | <b>219</b> | 177        | <b>203</b> |
| RLt16         | αPD-1         | △                | 60                                                | 115        | 112        | 59                              | <b>248</b> | 235        | <b>463</b> |
| RFI16         | αPD-1         | ■                | 78                                                | <b>388</b> | <b>485</b> | 58                              | <b>376</b> | <b>339</b> | <b>391</b> |
| 82_13         | αPD-1         | ▲                | 64                                                | 117        | 251        | 56                              | <b>953</b> | <b>980</b> | <b>950</b> |
| RVt16         | combined      | ○                | 60                                                | 164        | 197        | 58                              | 107        | 132        | 130        |
| RUm16         | combined      | ●                | 67                                                | 100        | 116        | 53                              | 89         | 264        | 67         |
| RYi16         | combined      | □                | 66                                                | <b>247</b> | 266        | 64                              | <b>257</b> | 195        | <b>275</b> |
| RVr16         | combined      | △                | 65                                                | 101        | 93         | 55                              | 86         | 82         | 93         |
| RYu16         | combined      | ■                | 55                                                | 72         | 94         | 57                              | 169        | <b>328</b> | <b>308</b> |
| RZl16         | combined      | ▲                | 74                                                | <b>496</b> | <b>547</b> | 69                              | <b>700</b> | <b>470</b> | <b>617</b> |
| RHs16         | combined      | ▼                | 63                                                | 107        | 130        | 61                              | 162        | 209        | <b>268</b> |
| RKt16         | BsAb          | ○                | 83                                                | 67         | 85         | 55                              | 56         | 74         | 61         |
| RZw15         | BsAb          | □                | 78                                                | 71         | 101        | 73                              | 67         | 92         | 86         |
| RZn16         | BsAb          | △                | 56                                                | 64         | 87         | 54                              | 106        | 131        | 136        |
| RUv15         | BsAb          | ●                | 56                                                | 75         | 89         | 60                              | 184        | 204        | 167        |
| ROp16         | BsAb          | ■                | 67                                                | 89         | 122        | 51                              | 57         | 61         | 90         |
| RFj16         | BsAb          | ▲                | 82                                                | 146        | 134        | 61                              | 73         | 110        | 91         |
| RQt16         | BsAb          | ▽                | 50                                                | 51         | 97         | 55                              | 76         | 91         | 90         |
| RKi16         | BsAb          | ▼                | 62                                                | 84         | 189        | 67                              | 84         | 223        | 138        |
| <b>cutoff</b> |               |                  | <b>87</b>                                         | <b>205</b> | <b>327</b> | <b>87</b>                       | <b>205</b> | <b>327</b> | <b>195</b> |

<sup>a</sup>From plasma, the levels of cross-reactive anti-drug antibodies (ECL, electrochemiluminescence) were quantified by MSD assay against anti-PD-1 mAb, anti-CTLA-4 mAb, anti-CTLA-4/PD-1 mAb, and the VHDUM (control) mAb. ADAs were assayed in all RMs prior to infection (day -21 p.i.) and during chronic infection, prior to ART initiation (day 52 p.t.). Cutoff for positivity as listed at bottom of the table, and ECL values above the cutoff are indicated in bold font.



**Supplementary Table 2. Clinical diagnoses and adverse events observed in ICB-treated RMs segmented by study phase.**

| Animal ID | Clinical observation                                             | Study phase of observation <sup>a</sup> |           |                  |          | ICB Treatment | Annotated Symbol |
|-----------|------------------------------------------------------------------|-----------------------------------------|-----------|------------------|----------|---------------|------------------|
|           |                                                                  | pre-ART                                 | on-ART    | ICB <sup>b</sup> | post-ATI |               |                  |
| RJd16     | Anemia                                                           |                                         | -57 p.t.  |                  |          | control       | □                |
| RTw16     | Dermatitis                                                       |                                         | -76 p.t.  |                  |          | control       | △                |
| RTw16     | Erythematous skin                                                |                                         |           | 0 p.t.           |          | control       | △                |
| RTw16     | Vomited during infusion                                          |                                         |           | 0 p.t.*          |          | control       | △                |
| RTw16     | Dermatitis                                                       |                                         |           | 7 p.t.           |          | control       | △                |
| RFu15     | Lymphocytosis                                                    |                                         | -125 p.t. |                  |          | control       | ◇                |
| RHj16     | Diarrhea                                                         |                                         |           |                  | 184 p.A. | control       | ⊙                |
| RJr16     | Inflammation at LN biopsy site                                   |                                         | -32 p.t.  |                  |          | αCTLA-4       | □                |
| RAq16     | Calcinosis cutis                                                 |                                         | -34 p.t.  |                  |          | αCTLA-4       | △                |
| RAq16     | Debulking surgery for Calcinosis cutis                           |                                         | -31 p.t.  |                  |          | αCTLA-4       | △                |
| 138_14    | Hematoma at catheter site                                        |                                         |           | 8 p.t.*          | 14 p.A   | αCTLA-4       | ▽                |
| 138_14    | Anemia                                                           |                                         |           |                  | 14 p.A   | αCTLA-4       | ▽                |
| 138_14    | Epistaxis; <i>S. aureus</i> and <i>E. faecalis</i>               |                                         |           |                  | 28 p.A.  | αCTLA-4       | ▽                |
| 138_14    | Enlarged heart, liver, and spleen with lung opacity <sup>c</sup> |                                         |           |                  | 44 p.A   | αCTLA-4       | ▽                |
| RAi16     | Prolonged recovery post-infusion                                 |                                         |           | 14 p.t.*         |          | αCTLA-4       | ■                |
| RAi16     | Idiopathic degenerative bone disease                             |                                         |           | 0 p.t.           |          | αCTLA-4       | ■                |
| RWs16     | Inflammation at LN biopsy site                                   |                                         | -25 p.t.  |                  |          | αPD-1         | ○                |
| RPo16     | Inflammation at LN biopsy site                                   |                                         | -26 p.t.  |                  |          | αPD-1         | ●                |
| RLt16     | Sneezing throughout infusion                                     |                                         |           | 14 p.t.*         |          | αPD-1         | △                |
| RLt16     | Thrombocytopenia                                                 |                                         |           |                  | 168 p.A. | αPD-1         | △                |
| 82_13     | Vomited prior to infusion                                        |                                         |           | 0 p.t.           |          | αPD-1         | ▲                |
| RUm16     | Anemia                                                           |                                         |           | 0 p.t.           |          | combined      | ●                |
| RYi16     | Inflammation at LN biopsy site                                   |                                         | -32 p.t.  |                  |          | combined      | □                |
| RVr16     | Sterile hematoma                                                 |                                         | -110 p.t. |                  |          | combined      | △                |
| RHs16     | Diarrhea                                                         |                                         |           | 22 p.t.*         |          | combined      | ▼                |
| ROp16     | Inflammation at LN biopsy site                                   |                                         | -21 p.t.  |                  |          | BsAb          | ■                |
| ROp16     | Vomited prior to infusion                                        |                                         |           | 8 p.t.           |          | BsAb          | ■                |
| RFj16     | Anemia                                                           |                                         | -41 p.t.  |                  |          | BsAb          | ▲                |
| RKi16     | Vomited after infusion                                           |                                         |           | 14 p.t.*         |          | BsAb          | ▼                |

<sup>a</sup>Timing of clinical observations by days post-infection (p.i.), post-treatment (p.t.), or post-ART interruption (p.A.) divided by study phase as follows: during acute/chronic infection prior to ART initiation ('pre-ART'); following ART initiation, but prior to intervention ('on-ART'); during ICB therapy while on-ART ('ICB'); and following ART interruption ('post-ATI').

<sup>b</sup>During the ICB phase, observations were made prior to infusion unless otherwise specified (\*).

<sup>c</sup>Pathology reports suggest that symptoms could be related to chronic SIV infection or compromised cardiac function.

**Supplementary Table 3. Summary of significant study readouts segmented by intervention.**

| Parameter <sup>a</sup>                                | Parental Population              | Tissue | control | αCTLA-4 | αPD-1 | combined blockade | BsAb |
|-------------------------------------------------------|----------------------------------|--------|---------|---------|-------|-------------------|------|
| <b>Biological activity</b>                            |                                  |        |         |         |       |                   |      |
| PD-1 occupancy                                        | memory CD4 <sup>+</sup>          | PBMC   |         |         | ↑↑↑↑  | ↑↑↑↑              | ↑↑↑↑ |
| PD-1 occupancy                                        | memory CD8 <sup>+</sup>          | PBMC   |         |         | ↑↑↑↑  | ↑↑↑↑              | ↑↑↑↑ |
| PD-1 occupancy                                        | memory CD4 <sup>+</sup>          | LN     |         |         | ↑↑↑↑  | ↑↑↑↑              | ↑↑   |
| PD-1 occupancy                                        | memory CD8 <sup>+</sup>          | LN     |         |         | ↑↑↑↑  | ↑↑↑↑              | ↑↑↑↑ |
| CTLA-4 expression                                     | memory CD4 <sup>+</sup>          | PBMC   |         | ↑↑↑↑    | ↑     | ↑↑↑↑              | ↑↑↑↑ |
| CTLA-4 expression                                     | memory CD4 <sup>+</sup>          | LN     |         | ↑↑      |       | ↑↑↑↑              | ↑    |
| T <sub>REG</sub> expansion                            | memory CD4 <sup>+</sup>          | PB     |         | ↑↑      |       | ↑↑↑↑              | ↑↑   |
| <b>Immunophenotype</b>                                |                                  |        |         |         |       |                   |      |
| Cell cycling                                          | memory CD4 <sup>+</sup>          | PB     |         | ↑↑↑↑    |       | ↑↑↑↑              | ↑↑↑↑ |
| Cell cycling                                          | memory CD8 <sup>+</sup>          | PB     |         |         |       | ↑↑↑↑              | ↑    |
| T <sub>EM</sub> expansion                             | CD4 <sup>+</sup>                 | PB     |         |         |       | ↑↑↑↑              | ↑↑↑↑ |
| T <sub>EM</sub> expansion                             | CD8 <sup>+</sup>                 | PB     |         |         |       | ↑                 | ↑↑↑↑ |
| Cell cycling                                          | memory CD4 <sup>+</sup>          | LN     |         | ↑↑↑↑    |       | ↑↑↑↑              | ↑    |
| Cell cycling                                          | memory CD8 <sup>+</sup>          | LN     |         | ↑↑↑↑    |       | ↑↑↑↑              | ↑    |
| Cell cycling                                          | T <sub>EM</sub> CD4 <sup>+</sup> | LN     |         | ↑↑↑↑    |       | ↑↑↑↑              | ↑↑   |
| Activation                                            | memory CD4 <sup>+</sup>          | LN     |         |         |       | ↑↑                | ↑    |
| Activation                                            | memory CD8 <sup>+</sup>          | LN     |         |         |       |                   | ↑    |
| <b>SIV-specific responses</b>                         |                                  |        |         |         |       |                   |      |
| IFN-γ ELISpot; SIV-Gag                                | bulk                             | PBMC   |         | ↓       |       |                   |      |
| IFN-γ ELISpot; SIV-Env                                | bulk                             | PBMC   |         |         |       |                   |      |
| IFN-γ ELISpot; SIV-Gag                                | bulk                             | LN     |         |         |       |                   |      |
| IFN-γ ELISpot; SIV-Env                                | bulk                             | LN     |         | ↓       |       |                   |      |
| Cytokine distribution; SIV-Gag                        | memory CD4 <sup>+</sup>          | PBMC   |         |         |       |                   |      |
| Cytokine distribution; SIV-Env                        | memory CD8 <sup>+</sup>          | PBMC   |         |         |       |                   |      |
| <b>Latency reactivation</b>                           |                                  |        |         |         |       |                   |      |
| Detectable viremia on-ART during ICB                  | by animal                        | plasma | 0/6     | 2/6     | 3/6   | 4/7               | 4/8  |
| Detectable viremia on-ART during ICB                  | by event                         | plasma | 0/24    | 3/24    | 3/24  | 9/28              | 6/32 |
| cell-associated SIV-RNA                               | bulk                             | PBMC   |         |         |       | ↑                 |      |
| <b>Viral reservoir content</b>                        |                                  |        |         |         |       |                   |      |
| cell-associated SIV-DNA                               | T <sub>EM</sub> CD4 <sup>+</sup> | LN     |         | ↓↓      |       | ↓↓                | ↓    |
| IPDA <sup>b</sup>                                     | CD4 <sup>+</sup>                 | LN     |         |         |       | ↓                 | ↓    |
| # vRNA <sup>+</sup>                                   | BCF                              | LN     |         |         |       | ↓                 |      |
| # vDNA <sup>+</sup>                                   | BCF                              | LN     |         |         |       |                   | ↓    |
| # vDNA <sup>+</sup>                                   | TCZ                              | LN     |         |         |       |                   | ↓    |
| <b>Virological rebound following ART interruption</b> |                                  |        |         |         |       |                   |      |
| Delay in rebound of viremia                           |                                  | plasma |         |         | ↑     |                   |      |
| Peak viremia post-ATI                                 |                                  |        |         |         |       |                   |      |
| Set point viremia post-ATI                            |                                  |        |         |         |       |                   |      |
| cell-associated SIV-RNA                               | bulk                             | LN     |         |         |       |                   |      |
| cell-associated SIV-DNA                               | bulk                             | LN     |         |         |       |                   |      |

<sup>a</sup>A summary of significance for each tested parameter within the specified parental population of a given tissue (at left) stratified by treatment group (above). Directionality of the response is indicated as positive by the upward arrow (green) and as negative by the downward arrow (red). The strength of significance is indicated by the number of consecutive arrows, which follows the rule: ↑, p<0.05; ↑↑, p<0.01; ↑↑↑, p<0.001; ↑↑↑↑, p<0.0001. All significance is relative to controls unless otherwise noted and reflects the strongest observed significance for longitudinal measures.

<sup>b</sup>For IPDA in CD4<sup>+</sup> LN, the significance for combined blockade is p=0.0860.
